# Supplementary material for: SalmoSim: the development of a three-compartment in vitro simulator of the Atlantic Salmon GI tract and associated microbial communities
Source: Research Square preprint supplement (doi:10.21203/rs.3.rs-208799/v1), 2021-02-11
Supplement: Supplementary file 1 [file de3287ba953ba4709f19c507.xlsx]

## Sheet: Sheet1
Ingredient (% of the feed)	Fish meal	Fish meal free
Fish meal	17.5	0
Soya protein concentrate	12	27.8
Corn gluten	7	7.35
Wheat gluten	10	14.34
Sunflower expeller	3.41	0
Wheat	4.81	11.22
Beans dehulled	10	0
Fish oil	15.68	16.99
Rapeseed oil	11.78	11.79
Linseed oil	3.05	3.2
Mannooligosaccharide	0.4	0.4
Astaxanthin	0.04	0.04
Crystalline amino acids	1.35	1.99
Mineral premixes	1.83	2.66
Vitamin premixes	0.6	0.73
Macronutrients (% of the feed)	Fish meal	Fish meal free
Moisture	5.9	6.13
Crude Protein	39.1	40.1
Crude Fat	33.4	33.3
Ash	5.47	4.2
Starch	9.4	11
Crude Fibre	2	2.7
